# Supplementary figures and images for: An A2Aadenosine receptor agonist, ATL313, reduces inflammation and improves survival in murine sepsis models
Source: Springer Nature journal article supplement (doi:10.1186/1471-2334-8-141), 2008-10-20

Percent Survival

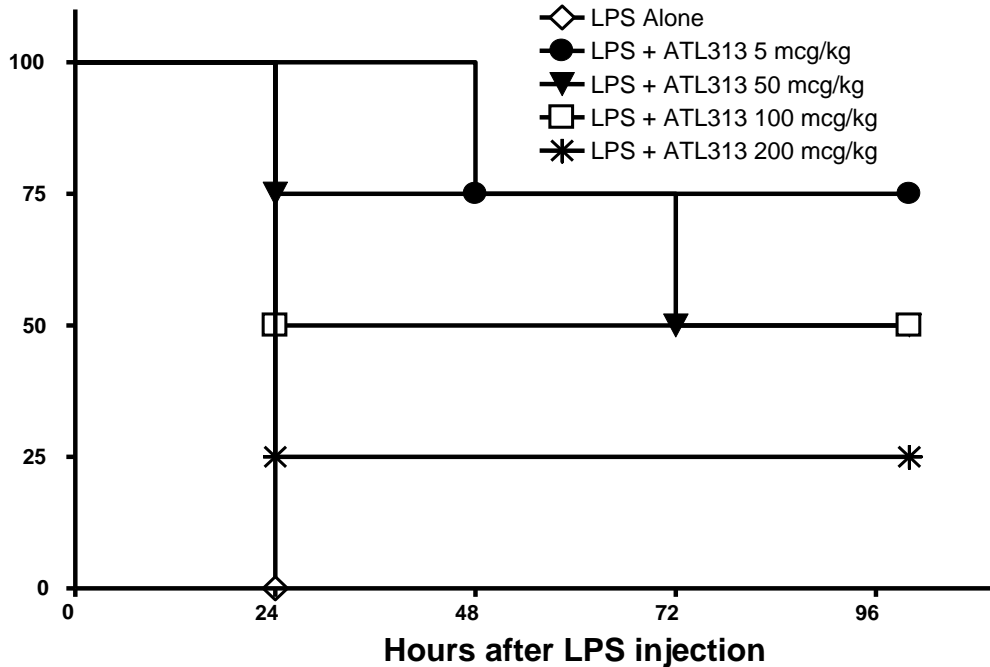

Supplement: 12879_2008_732_MOESM1_ESM.pdf [file 12879_2008_732_MOESM1_ESM.pdf]

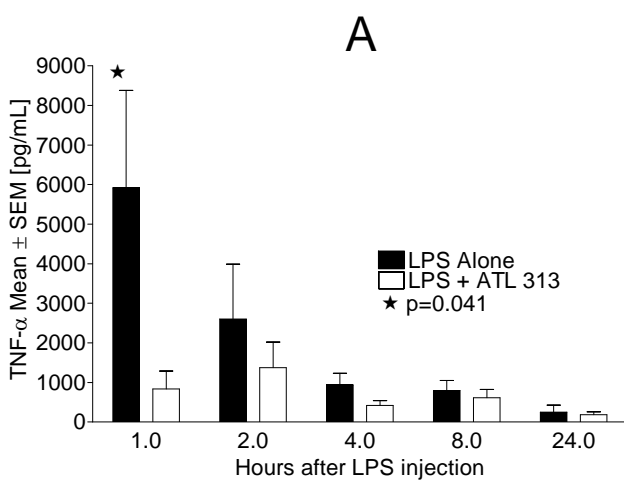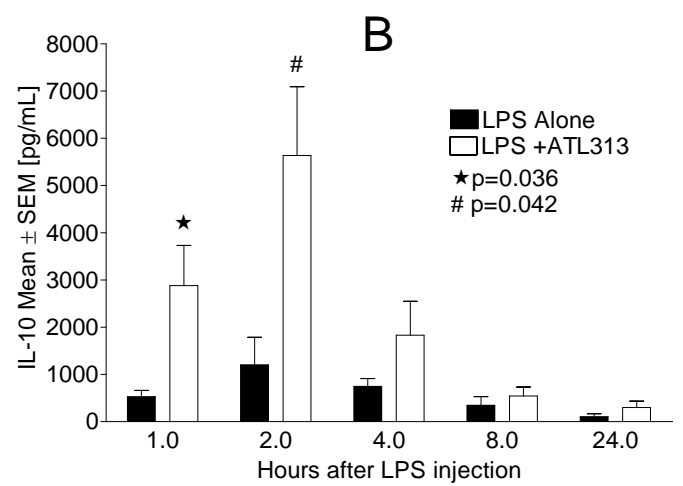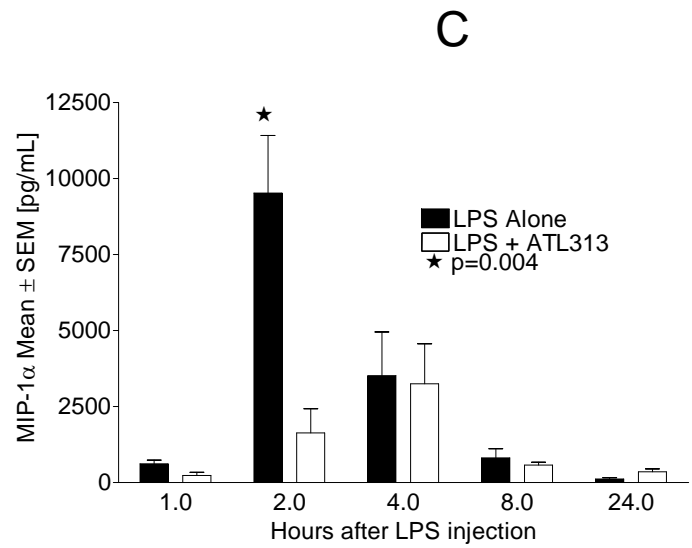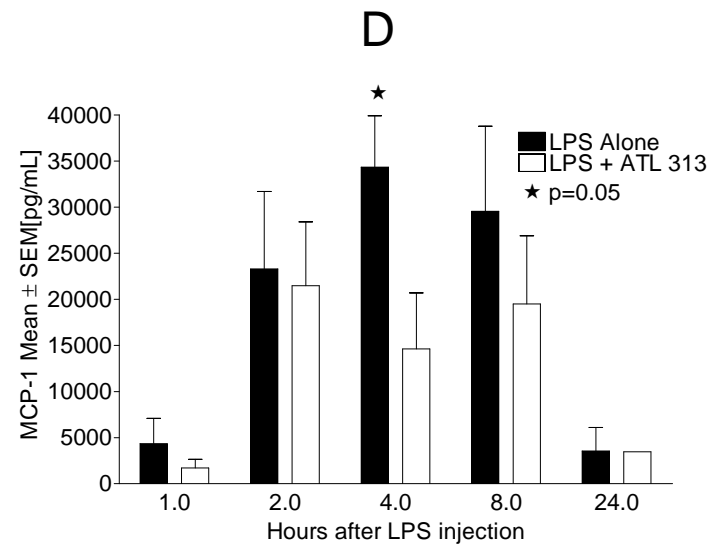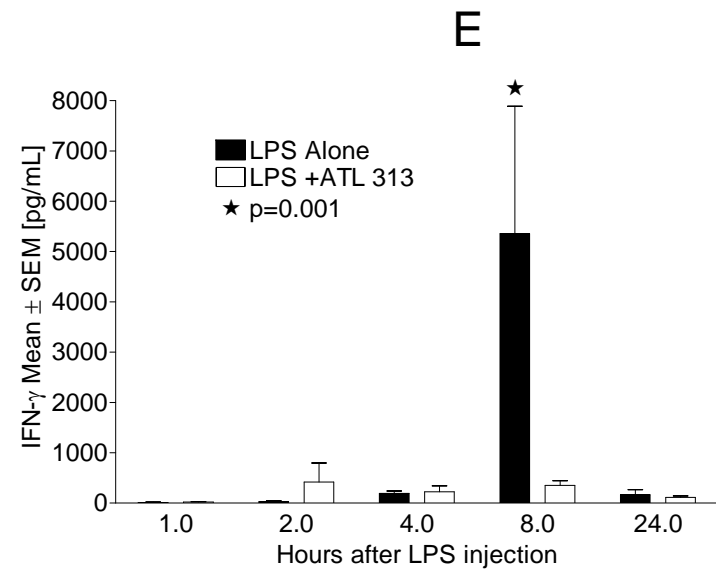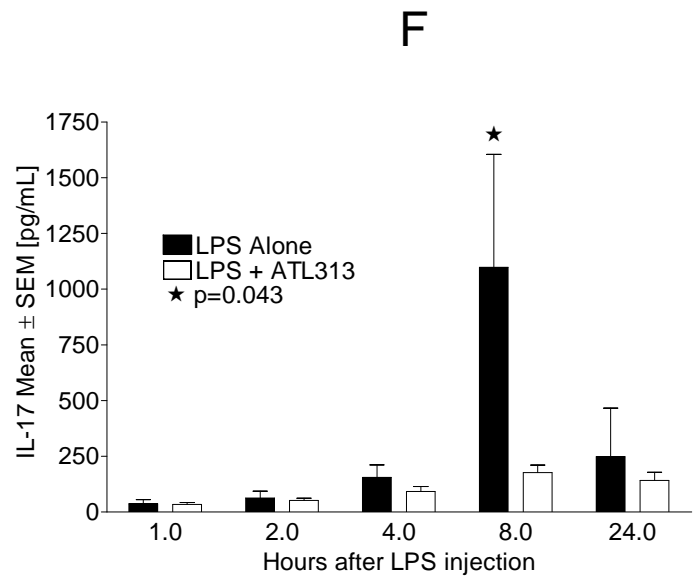

Supplement: 12879_2008_732_MOESM3_ESM.pdf [file 12879_2008_732_MOESM3_ESM.pdf]

# A

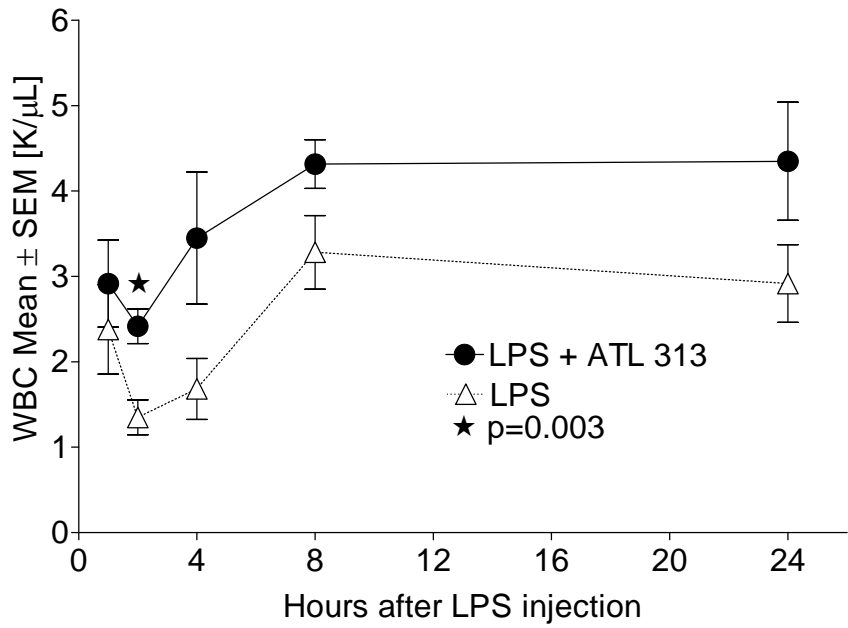

# B

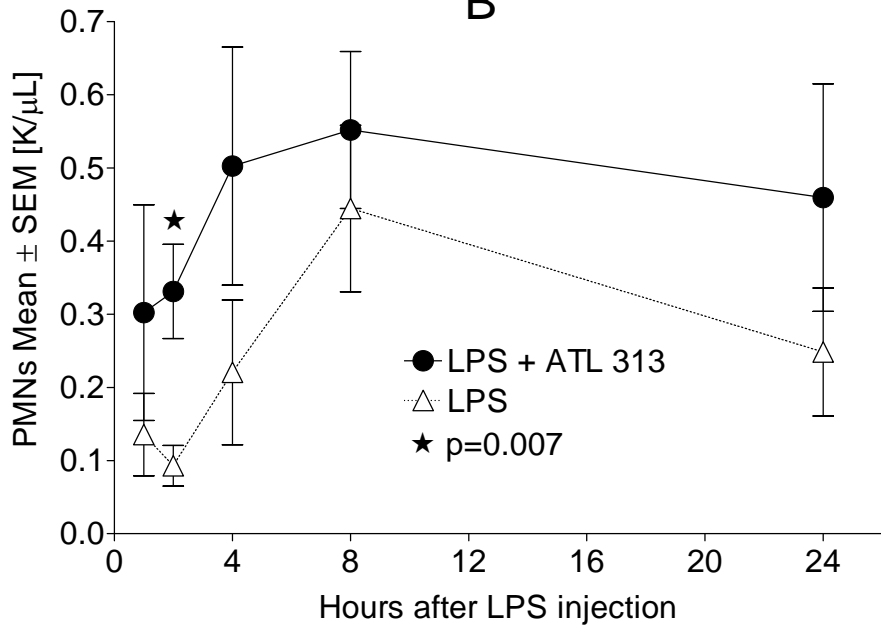

Supplement: 12879_2008_732_MOESM4_ESM.pdf [file 12879_2008_732_MOESM4_ESM.pdf]
